# Supplementary material for: Comparison of biodegradable and durable polymer drug-eluting stents in acute coronary syndrome: a meta-analysis
Source: HighWire-hosted journal article supplement (doi:10.1136/bmjopen-2021-058075), 2022-06-01
Supplement: bmjopen-2021-058075supp003_data_supplement.pdf [file bmjopen-2021-058075supp003_data_supplement.pdf]

**Table 1. The characteristics of the included trails**

| Authors                   | Years       | Journal                                     | Study      | Center             | Country            | Follow up       | NO.patients |             |
|---------------------------|-------------|---------------------------------------------|------------|--------------------|--------------------|-----------------|-------------|-------------|
|                           |             |                                             |            |                    |                    |                 | BP-DES      | DP-DES      |
| <u>Hyo-Soo Kim</u>        | <u>2021</u> | <u>Circulation</u>                          | <u>RCT</u> | <u>multicentre</u> | <u>Korea</u>       | <u>12 month</u> | <u>1700</u> | <u>1713</u> |
| <u>Thomas Pilgrim</u>     | <u>2021</u> | <u>JACC</u>                                 | <u>RCT</u> | <u>multicentre</u> | <u>Switzerland</u> | <u>24month</u>  | <u>649</u>  | <u>651</u>  |
| <u>Juan F Iglesias</u>    | <u>2019</u> | <u>The Lancet</u>                           | <u>RCT</u> | <u>multicentre</u> | <u>Switzerland</u> | <u>12 month</u> | <u>649</u>  | <u>651</u>  |
| <u>Thomas Pilgrim</u>     | <u>2016</u> | <u>EuroIntervention</u>                     | <u>RCT</u> | <u>multicentre</u> | <u>Switzerland</u> | <u>12 month</u> | <u>211</u>  | <u>196</u>  |
| <u>Yao-Jun Zhang</u>      | <u>2015</u> | <u>Heart</u>                                | <u>RCT</u> | <u>multicentre</u> | <u>Netherlands</u> | <u>60month</u>  | <u>280</u>  | <u>293</u>  |
| <u>Hyun Jong Lee</u>      | <u>2015</u> | <u>International journal of cardiology</u>  | <u>RCT</u> | <u>multicentre</u> | <u>Korea</u>       | <u>24month</u>  | <u>171</u>  | <u>536</u>  |
| <u>Antoinette de Waha</u> | <u>2015</u> | <u>EuroIntervention</u>                     | <u>RCT</u> | <u>multicentre</u> | <u>multicentre</u> | <u>48month</u>  | <u>291</u>  | <u>206</u>  |
| <u>Qi Zhang</u>           | <u>2014</u> | <u>Journal of Interventional Cardiology</u> | <u>RCT</u> | <u>multicentre</u> | <u>China</u>       | <u>12 month</u> | <u>596</u>  | <u>596</u>  |

**Table 2. The baseline features of the patients**

| Authors            | basic characters |           |           |        |                 |           |              |        |          |        |
|--------------------|------------------|-----------|-----------|--------|-----------------|-----------|--------------|--------|----------|--------|
|                    | Age              |           | SEX(MALE) |        | Body mass index |           | Hypertension |        | Diabetes |        |
|                    | BP-DES           | DP-DES    | BP-DES    | DP-DES | BP-DES          | DP-DES    | BP-DES       | DP-DES | BP-DES   | DP-DES |
| Hyo-Soo Kim        | 63.1±11.1        | 63.0±11.1 | 1337      | 1351   | 25.0±3.2        | 24.9±3.1  | 1147         | 1092   | 747      | 789    |
| Juan F Iglesias    | 62.2±11.8        | 63.2±11.8 | 513       | 477    | 26.9± 4.3       | 26.8± 4.3 | 281          | 297    | 73       | 82     |
| Thomas Pilgrim     | 61.3±12.4        | 61.7±12.7 | 170       | 151    | 27.0±4.3        | 27.0±4.3  | 102          | 98     | 30       | 27     |
| Yao-Jun Zhang      | 62.9±11.7        | 62.8±11.7 | 215       | 210    | 27.5±4.4        | 27.8±4.6  | 181          | 198    | 55       | 46     |
| Hyun Jong Lee      | 64±14.08         | 63±14.08  | 128       | 400    | /               | /         | 102          | 308    | 82       | 269    |
| Antoinette de Waha | 62.5±12.1        | 63.1±12.6 | 214       | 149    | /               | /         | 142          | 110    | 56       | 34     |
| Qi Zhang           | 63.9±13.1        | 64.1±12.1 | 475       | 467    | /               | /         | 360          | 376    | 129      | 113    |

**Table 2. The baseline features of the patients**

| Authors            | basic characters |        |         |        |             |             |                         |             |                        |              |
|--------------------|------------------|--------|---------|--------|-------------|-------------|-------------------------|-------------|------------------------|--------------|
|                    | Dyslipidemia     |        | smoking |        | LVEF, %     |             | Stent number per person |             | Total stent length, mm |              |
|                    | BP-DES           | DP-DES | BP-DES  | DP-DES | BP-DES      | DP-DES      | BP-DES                  | DP-DES      | BP-DES                 | DP-DES       |
| Hyo-Soo Kim        | 1,247            | 1,280  | 515     | 475    | 58.7±10.4   | 58.5±10.4   | 1.7±1.1                 | 1.7±1.0     | 42.9±31.9              | 41.7±30.2    |
| Juan F Iglesias    | 304              | 302    | 294     | 250    | 49.0 ± 11.0 | 48.4 ± 11.2 | 1.37 ± 0.64             | 1.39 ± 0.66 | 31.91± 18.21           | 33.92± 19.76 |
| Thomas Pilgrim     | 110              | 101    | 93      | 77     | 49.5±10.9   | 48.3±11.1   | 1.42±0.71               | 1.39±0.71   | 29.49±17.83            | 30.52±18.99  |
| Yao-Jun Zhang      | 152              | 176    | 107     | 115    | 51.5±10.1   | 51.4±11.8   | 2.2±0.5                 | 2.2±0.6     | 26.6±15                | 27.9±15.2    |
| Hyun Jong Lee      | 116              | 389    | 65      | 228    | 55 (45–65)  | 52 (43–62)  | /                       | /           | /                      | /            |
| Antoinette de Waha | 119              | 109    | 120     | 90     | 47±10       | 48±12       | /                       | /           | 25.9±12.6              | 27.7±14.2    |
| Qi Zhang           | 87               | 76     | 257     | 223    | 50±12       | 49.0 ± 17.0 | /                       | /           | /                      | /            |
